# Supplementary material
Source: PubMed Central journal article supplement (PMC3243552)
Supplement: supp_M111.251694_Supplementary_table_1.pdf [file supp_M111.251694_Supplementary_table_1.pdf]

**Supplementary Table 1 Primer sequences**

| Target gene       | Forward primer                        | Reverse primer                         |
|-------------------|---------------------------------------|----------------------------------------|
| ITCH              | 5'-ATATGGATCCATGTCTGACAGTGGATCACAACTT | 5'-ATATGTCGACTTACTCTTGTCCAATCCTTCTGT   |
| ITCH $\Delta$ WW1 | 5'-CTGTAAGTCAAGCTCCCTTGCTACCTCCTGGC   | 5'-CAAGGGAGCTTGAGTTACAGGATTTAATGGCCTAG |
| ITCH $\Delta$ WW2 | 5'-GATAGACCAGAACCTCTACTGGAATCCGT      | 5'-TAGAGGTTCTGGTCTATCCCATGTTGTTCT      |
| ITCH $\Delta$ WW3 | 5'-GATCCTCTTGGTCCATTGAGTCAAGGTCA      | 5'-CAATGGACCAAGAGGATCAAATCTTTACTTTG    |
| ITCH $\Delta$ WW4 | 5'-CAGAAGTCAAGGTCAATTAATGAAAAGACAGGA  | 5'-GACCTTGACTTCTGGGGTCTTCCCATTGTGTA    |
| LAPTM5            | 5'-CGCGGATCCATGGACCCCCGCTTGTCCAC      | 5'-ACGCGTCGACTCACACCTCTGAGTATGGGG      |
| LAPTM5 Del        | 5'-CGCGGATCCATGGACCCCCGCTTGTCCAC      | 5'-ACGCGTCGACTCACACCTCTGATGCTGGGC      |
